# Supplementary material
Source: PubMed Central journal article supplement (PMC3078435)
Supplement: mmc2.pdf [file mmc2.pdf]

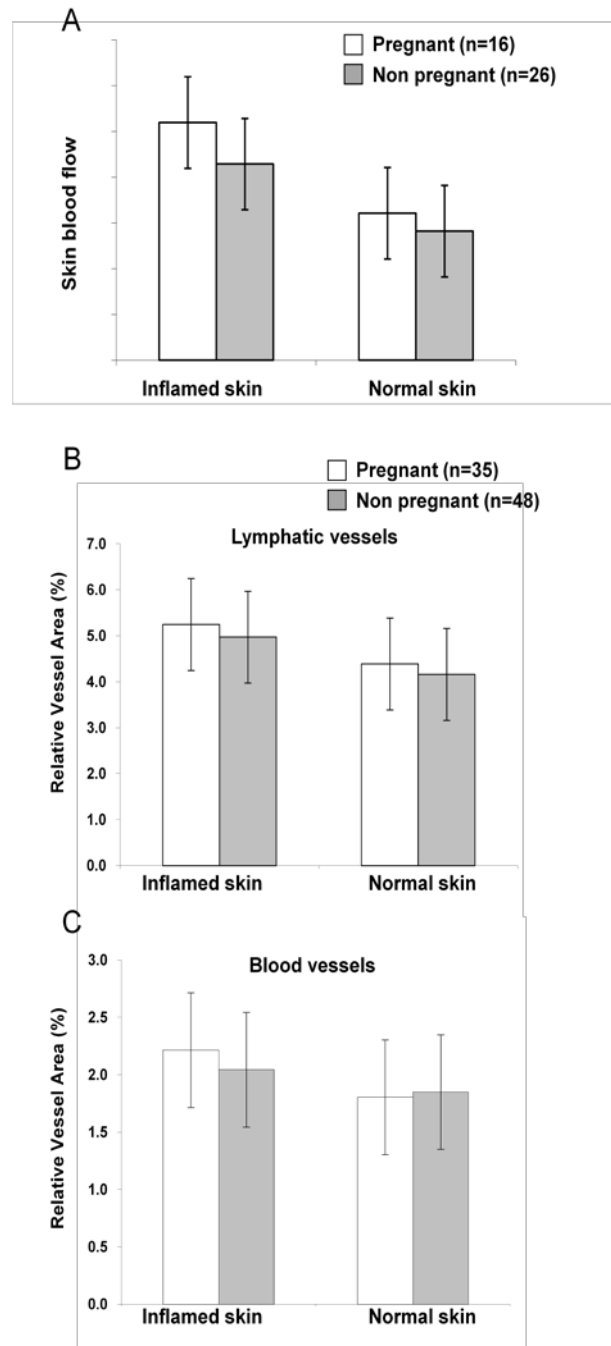

**Figure S2: Skin perfusion assessment and morphometric vessel analysis in inflamed and normal skin in pregnant and non pregnant mice.** Contact hypersensitivity using oxazolone was induced on the right ears. The left ears received vehicle only. A) Laser doppler perfusion imaging experiments were performed under general analgesia on both ears 4 days after induction of contact hypersensitivity (D20 after mating). There was a significant increase in blood perfusion in inflamed ears compared to non-inflamed ears in both pregnant and non

pregnant mice ( $p=0.004$ ) but no difference between pregnant and non pregnant mice. B, C) Frozen sections of inflamed and non inflamed skin were double-stained for Lyve-1 (B) and CD31 (C). Comparison between pregnant and non pregnant animals did not disclose any significant difference.
