# Supplementary material
Source: PubMed Central journal article supplement (PMC3078435)
Supplement: mmc3.pdf [file mmc3.pdf]

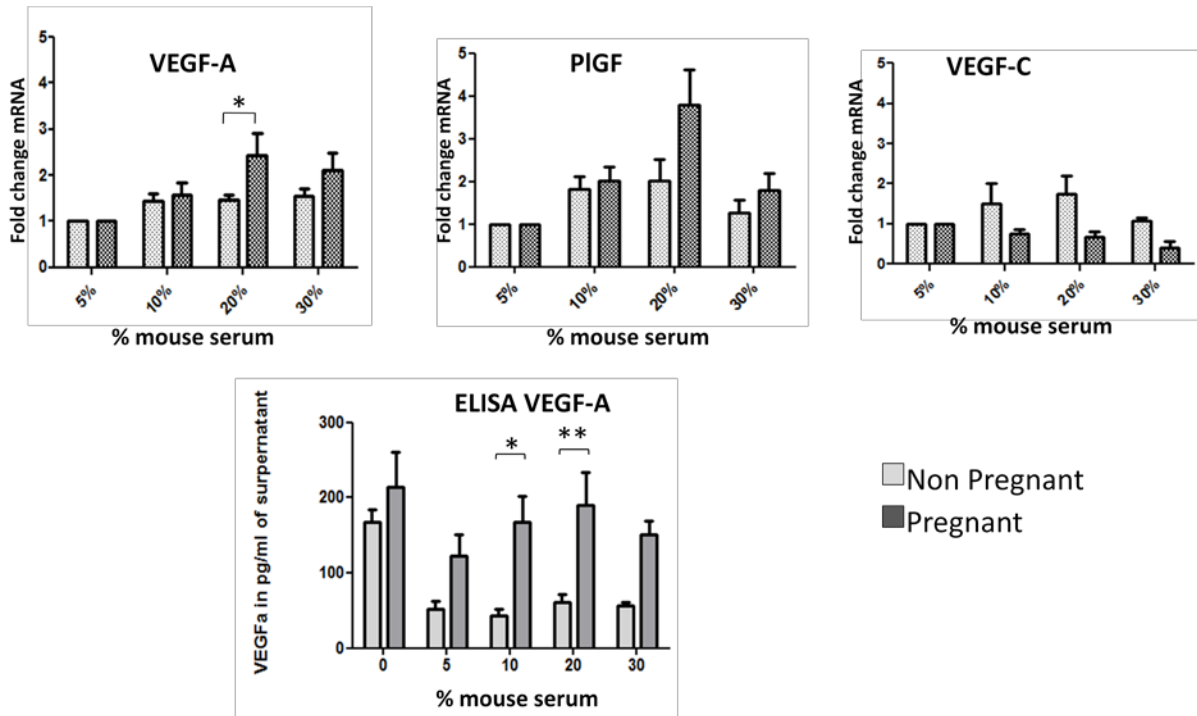

**Figure S3: In vitro stimulation of B16 melanoma cell line with serum from pregnant and non-pregnant animals**

B16 melanoma cells were serum deprived overnight and were stimulated with different conditions (left side columns). After 24 hours, cells were collected for RNA extraction and subsequent quantitative RT-PCR targeting VEGF-A, VEGF-C or PIGF as indicated.

Similarly, the culture supernatant was analysed by VEGF-A ELISA. Mouse serum was obtained from pregnant and non pregnant animals matched for age. Each panel represents 2-5 independent experiments. Results are expressed as means +/- standard error and were compared using ANOVA with Bonferroni correction for repeated measures.
